# Supplementary material
Source: MDPI journal article supplement (https://www.mdpi.com/2073-4441/13/24/3507)
Supplement: s1 [file s1]

## **Supplementary Material for**

### **Neural network and random forest-based analyses of the performance of community drinking water arsenic treatment plants**

Animesh Bhattacharya<sup>a</sup>, Saswata Sahu<sup>b</sup>, Venkatesh Telu<sup>c</sup>, Srimanti Duttagupta<sup>d</sup>, Soumyajit Sarkar<sup>a</sup>, Jayanta Bhattacharya<sup>c</sup>, Abhijit Mukherjee<sup>a,f,\*</sup>, Partha Sarathi Ghosal<sup>b,\*</sup>

<sup>a</sup>School of Environmental Science and Engineering, Indian Institute of Technology Kharagpur, Kharagpur 721 302, India

<sup>b</sup>School of Water Resources, Indian Institute of Technology Kharagpur, Kharagpur 721 302, India

<sup>c</sup>Department of Civil Engineering, Indian Institute of Technology Kharagpur, Kharagpur 721 302, India

<sup>d</sup>Graduate School of Public Health, San Diego State University, CA, 92182

<sup>e</sup>Department of Mining Engineering, Indian Institute of Technology Kharagpur, Kharagpur 721 302, India

<sup>f</sup>Department of Geology and Geophysics, Indian Institute of Technology Kharagpur, Kharagpur 721 302, India

\*Corresponding authors: Partha S. Ghosal([psghosal@swr.iitkgp.ac.in](mailto:psghosal@swr.iitkgp.ac.in)) and Abhijit Mukherjee ([amukh2@gmail.com](mailto:amukh2@gmail.com); [abhijit@gg.iitkgp.ac.in](mailto:abhijit@gg.iitkgp.ac.in))

**Table S1:**

Technical details of implemented schemes

| Tech. type | Reagents used                                                                                                   | AIRP flow diagram                                                                                                                                                                                                                                                                                                          | scheme                                                                                                                                                                        |
|------------|-----------------------------------------------------------------------------------------------------------------|----------------------------------------------------------------------------------------------------------------------------------------------------------------------------------------------------------------------------------------------------------------------------------------------------------------------------|-------------------------------------------------------------------------------------------------------------------------------------------------------------------------------|
| 8          | Media-GFH<br>Disinfectant-<br>$\text{Ca}(\text{ClO})_2$                                                         | <pre> graph LR     RawWaterPump([Raw water pump]) --&gt; OxidationUnit[Oxidation unit]     OxidationUnit --&gt; IRU[IRU]     IRU --&gt; ARU[ARU]     ARU --&gt; ClDosing[Cl dosing]     ClDosing --&gt; OHT((OHT))     OHT --&gt; ForDistribution[For distribution]           </pre>                                       | (Arabpur PWSS, Doradaha PWSS, Gobindapur PWSS, Habibpur PWSS, Karimpur jalangi PWSS Zone 6-10, Narayanpur PWSS)                                                               |
| 1          | Media-AA<br>Coagulant- $\text{FeCl}_3$<br>Oxidant- $\text{NaClO}$<br>Disinfectant-<br>$\text{Ca}(\text{ClO})_2$ | <pre> graph LR     RawWaterPump([Raw water pump]) --&gt; OxidationPath[Oxidation path]     OxidationPath --&gt; PTUFU[PTU/FU]     PTUFU --&gt; PolishingUnit[Polishing unit]     PolishingUnit --&gt; ClDosing[Cl dosing]     ClDosing --&gt; OHT((OHT))     OHT --&gt; ForDistribution[For distribution]           </pre> | Goukhana Lalgola PWSS, Dier Shyampur PWSS, Komnagar PWSS, Ramchandrapur PWSS, Udaynagar PWSS, Ukhilnara WSS zone 2, Bhayna AIRP, Bansberia AIRP, Chandpur PWSS, Khanjepur WSS |

|         |                                                                                                                                                                |                                                                                                                                                                                                                                                                                                              |                                                                                                                                                                                                                                                                                                                                                                                     |
|---------|----------------------------------------------------------------------------------------------------------------------------------------------------------------|--------------------------------------------------------------------------------------------------------------------------------------------------------------------------------------------------------------------------------------------------------------------------------------------------------------|-------------------------------------------------------------------------------------------------------------------------------------------------------------------------------------------------------------------------------------------------------------------------------------------------------------------------------------------------------------------------------------|
| 1 and 2 | Media-AA<br>Oxidant-<br>$\text{Ca}(\text{ClO})_2$<br>Coagulant- $\text{FeCl}_3$<br>or Alum + $\text{FeCl}_3$<br>Disinfectant-<br>$\text{NaClO}$ or $\text{Cl}$ | <pre> graph LR     CH((Chemical house)) --&gt; OC[Oxidation chamber]     OC --&gt; FM[Flash mixer]     FM --&gt; F[Flocculator]     F --&gt; PST[PST]     PST --&gt; FU[FU]     FU --&gt; AAC[AA chamber]     AAC --&gt; CWR((CWR)) </pre>                                                                   | Barabil Raghunathpur Zone 1-2, Birnagar AIRP, Dhantala AIRP, Dubli 1 AIRP, Garibpur Zone 2, Muradpur Jalangi Zone 1, Purba Khamar Simulia PWSS, Ukhilnara WSS zone 1, Sonda PWSS, Pansila PWSS, Banpur WSS, Beharia WSS, Dhakhinpara zone 2, Fatepur WSS, Helenchi WSS zone 2-3, Itaberia WSS, Jaypur WSS, Nrishinghapur AIRP, Kakramari WSS, Mahishnengra WSS Zone 1, Monipota WSS |
| 11      | Media-HIX<br>Oxidant-<br>$\text{Ca}(\text{ClO})_2$ / $\text{NaClO}$<br>Coagulant- $\text{FeCl}_3$<br>Disinfectant-<br>$\text{NaClO}$ / $\text{Cl}$             | <pre> graph LR     PH((pump house)) --&gt; RWR[Raw water reservoir]     RWR --&gt; DMFI[DMF I]     DMFI --&gt; DMFII[DMF II]     DMFII --&gt; HINI[HIN I]     HINI --&gt; HINII[HIN II]     HINII --&gt; OHT((OHT))     OHT --&gt; FD[For distribution] </pre>                                               | Ground Water Based Piped WSS for Digri & Its adj. mouzas, Ramnagar PWSS, Dubli PWSS, Taranipur WSS zone 2, Damodarkhali ground water based PWSS, Bajitpur Zone 1 WSS                                                                                                                                                                                                                |
| 1 and 3 | Media-AA<br>Coagulant-<br>alum+ $\text{FeSO}_4$ /<br>$\text{FeCl}_3$<br>Oxidant- $\text{NaClO}$<br>Disinfectant-<br>$\text{Ca}(\text{ClO})_2$                  | <pre> graph LR     PH((Pump house)) --&gt; CTA[Coke-tray aerator]     CTA --&gt; CT[Contact tank]     CT --&gt; PCCI((PC CC I))     CT --&gt; PCCII((PC CC II))     PCCI --&gt; PF[PF]     PCCII --&gt; PF     PF --&gt; PCAA[PC (AA)]     PCAA --&gt; OHT((OHT))     OHT --&gt; FD[For distribution] </pre> | Tarapur WSS, Santoshpur WSS, Palla WSS, Bajitpur Zone2 WSS, Gazna WSS, Ichhlampur WSS Zone 2, Kalaighata PWSS, Maia WSS, Paschim Panchberia PWSS zone 2, Sabdalpur AIRP                                                                                                                                                                                                             |

|    |                                                                                                                                |                                                                                                                                                                                                                                                                                             |                                                                                        |
|----|--------------------------------------------------------------------------------------------------------------------------------|---------------------------------------------------------------------------------------------------------------------------------------------------------------------------------------------------------------------------------------------------------------------------------------------|----------------------------------------------------------------------------------------|
| 10 | Media-GFH<br>Coagulant-<br>$\text{NaAlO}_2$<br>Oxidant- $\text{Na}_2\text{S}$<br>Disinfectant-<br>$\text{NH}_2\text{Cl}$       | <pre> graph LR     PH([Pump house]) --&gt; CT[Contact tank]     CT --&gt; CC1((CC I))     CT --&gt; CC2((CC II))     CC1 --&gt; PU1((PU I))     CC2 --&gt; PU2((PU II))     PU1 --&gt; OHR((OHR))     PU2 --&gt; OHR     OHR --&gt; FD[For distribution] </pre>                             | Aturia PWSS, Jasaikathi PWSS Zone 2, Mollahati PWSS,<br>Paschim Panchberia PWSS zone 1 |
| 1  | Media-AA<br>Coagulant- $\text{FeCl}_3$<br>Oxidant- $\text{NaClO}$<br>or $\text{Ca}(\text{ClO})_2$<br>Disinfectant- $\text{Cl}$ | <pre> graph LR     PH([Pump house]) --&gt; CTF[Contact tank cum flocculator]     CTF --&gt; ST[ST]     ST --&gt; PC1((PC I))     ST --&gt; PC2((PC II))     PC1 --&gt; PF[PF]     PC2 --&gt; PF     PF --&gt; PU[PU AA]     PU --&gt; OHT((OHT))     OHT --&gt; FD[For distribution] </pre> | Dhalani WSS, Bahirgachhi WSS Zone 2, Taldah WSS,<br>Hariharpur WSS, Kola PWSS          |

WSS - Water Supply Scheme, PWSS -Public Water Supply Scheme

## Section S2:

| Technology                 | Type    |
|----------------------------|---------|
| AA+FeCl <sub>3</sub>       | Tech 1  |
| AA/alum+FeCl <sub>3</sub>  | Tech 2  |
| AA/alum+FeSO <sub>4</sub>  | Tech 3  |
| AA+alum                    | Tech 4  |
| AA+FeSO <sub>4</sub>       | Tech 5  |
| GFH/alum+FeSO <sub>4</sub> | Tech 6  |
| GFH+FeCl <sub>3</sub>      | Tech 7  |
| GFH                        | Tech 8  |
| GFH+Na <sub>2</sub> S      | Tech 9  |
| GFH+NaAlO <sub>2</sub>     | Tech 10 |
| HIX+FeCl <sub>3</sub>      | Tech 11 |
| HIX+FeS                    | Tech 12 |
| HIX+NaAlO <sub>2</sub>     | Tech 13 |

## Section S3:

### Dataset for box plot of efficiency of major technologies:

| Type 1 | Type 2 | Type 3 | Type 5 | Type 8 | Type 10 | Type 11 |
|--------|--------|--------|--------|--------|---------|---------|
| 65.455 | 88.889 | 87.143 | 84.463 | 88.75  | 83.333  | 79.31   |
| 60     | 87.654 | 76.238 | 54.455 | 64.286 | 73.545  | 100     |
| 100    | 89.796 | 73.333 |        | 92.593 | 71.429  | 98.319  |
| 48.837 | 85.714 | 71.429 |        | 88.571 | 97.159  | 96.875  |
| 69.277 | 67.308 | 80.62  |        | 80.392 | 58.871  | 86.486  |
| 76.19  | 50     | 90.141 |        | 80     |         | 84.337  |
| 81.944 | 87.5   |        |        | 92.308 |         |         |
| 65.854 | 70.492 |        |        | 95     |         |         |
| 85.263 |        |        |        | 64.286 |         |         |
| 76.316 |        |        |        | 81.25  |         |         |
| 77.1   |        |        |        | 80     |         |         |
| 59.259 |        |        |        |        |         |         |
| 58.182 |        |        |        |        |         |         |
| 74.359 |        |        |        |        |         |         |
| 75     |        |        |        |        |         |         |
| 68.504 |        |        |        |        |         |         |
| 43.827 |        |        |        |        |         |         |
| 79.675 |        |        |        |        |         |         |
| 50     |        |        |        |        |         |         |
| 81.034 |        |        |        |        |         |         |
| 80     |        |        |        |        |         |         |

82.727  
80.412  
83.333  
68.382  
67.939  
65.823  
89  
75.676  
85.246  
81.315  
66.667  
60.714  
82.741  
80.282  
70  
72.816  
82.292  
68.421  
76.744  
76.744  
79.592  
76.744  
72.414  
74.51  
70.701  
76.378  
68.75  
66.154  
73.611  
82.456  
54.455  
61.702  
79.167  
99.167  
63.158  
38.776  
27.642  
43.827  
39.744

---

## Section S4:

### Error function for statistical analysis

Several error functions were used to evaluate the statistical significance of soft-computation models. The sum of the square of the error (SSE), sum of absolute error (SAE), average relative error (ARE), hybrid fractional error function (HYBRID), Marquardt's percent standard deviation (MPSD), chi-square test statistic ( $\chi^2$ ) are chosen as error functions and their mathematical expressions are as follows:

The sum of the square of the error (Kundu and Gupta, 2006)

$$SSE = \sum_{i=1}^n (Y_{pred} - Y_{exp})^2 \quad (1)$$

The sum of absolute error (Kundu and Gupta, 2006)

$$SAE = \sum_{i=1}^n |Y_{pred} - Y_{exp}| \quad (2)$$

The mean square error (Kundu and Gupta, 2006)

$$MSE = \frac{1}{n} \sum_{i=1}^n (Y_{pred} - Y_{exp})^2 \quad (3)$$

The mean absolute error (Tang et al., 2021)

$$MAE = \frac{1}{n} \sum_{i=1}^n |Y_{pred} - Y_{exp}| \quad (4)$$

The average relative error (Kundu and Gupta, 2006)

$$ARE = \frac{100}{n} \sum_{i=1}^n \left| \frac{Y_{pred} - Y_{exp}}{Y_{exp}} \right| \quad (5)$$

The hybrid fractional error function (Kundu and Gupta, 2006)

$$HYBRID = \frac{100}{n - p} \sum_{i=1}^n \left[ \frac{(Y_{pred} - Y_{exp})^2}{Y_{exp}} \right] \quad (6)$$

The Marquardt's percent standard deviation (Kundu and Gupta, 2006)

$$MPSD=100\sqrt{\frac{1}{n-p}\sum_{i=1}^n\left[\frac{(Y_{pred}-Y_{exp})}{Y_{exp}}\right]^2} \quad (7)$$

Where, n is the number of data points, and p is the number of parameters considered for modeling, n-p is the degree of freedom.



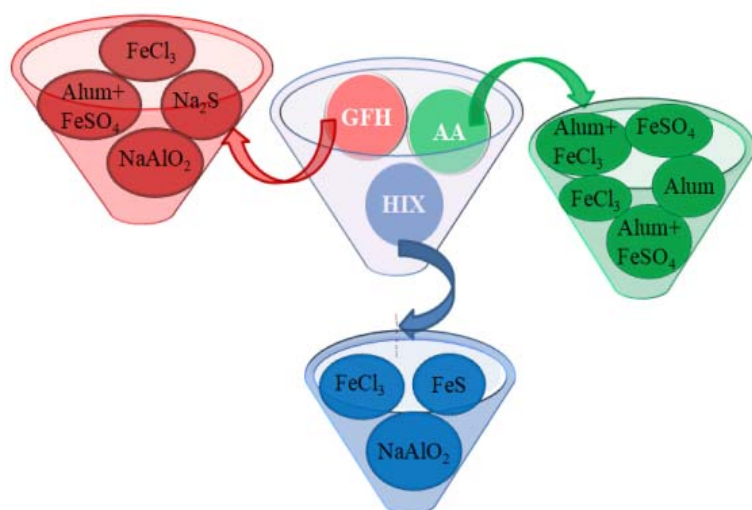

**Figure S1:** Combination of technologies concerning media and chemicals

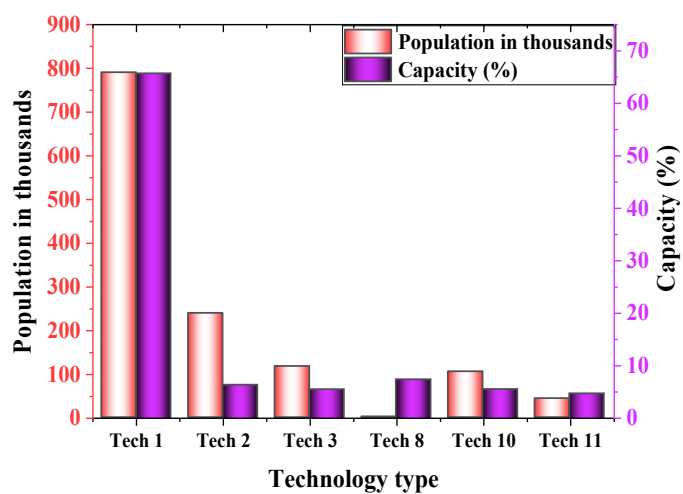

**Figure S2:** Contribution of major technologies to population and capacity (>90%)

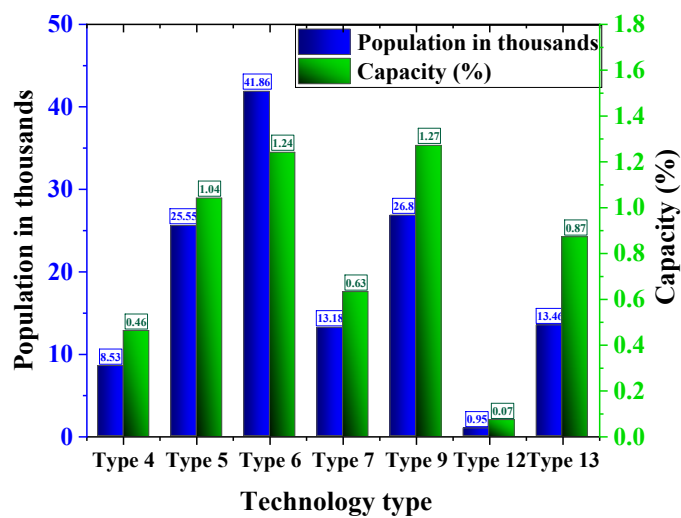

**Figure S3:** Contribution of minor technologies to population and capacity

(<10%)

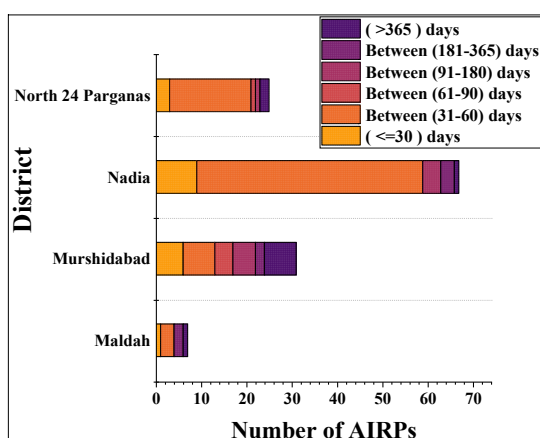

**Figure S4:** Frequency of sampling of effluent water in AIRPs

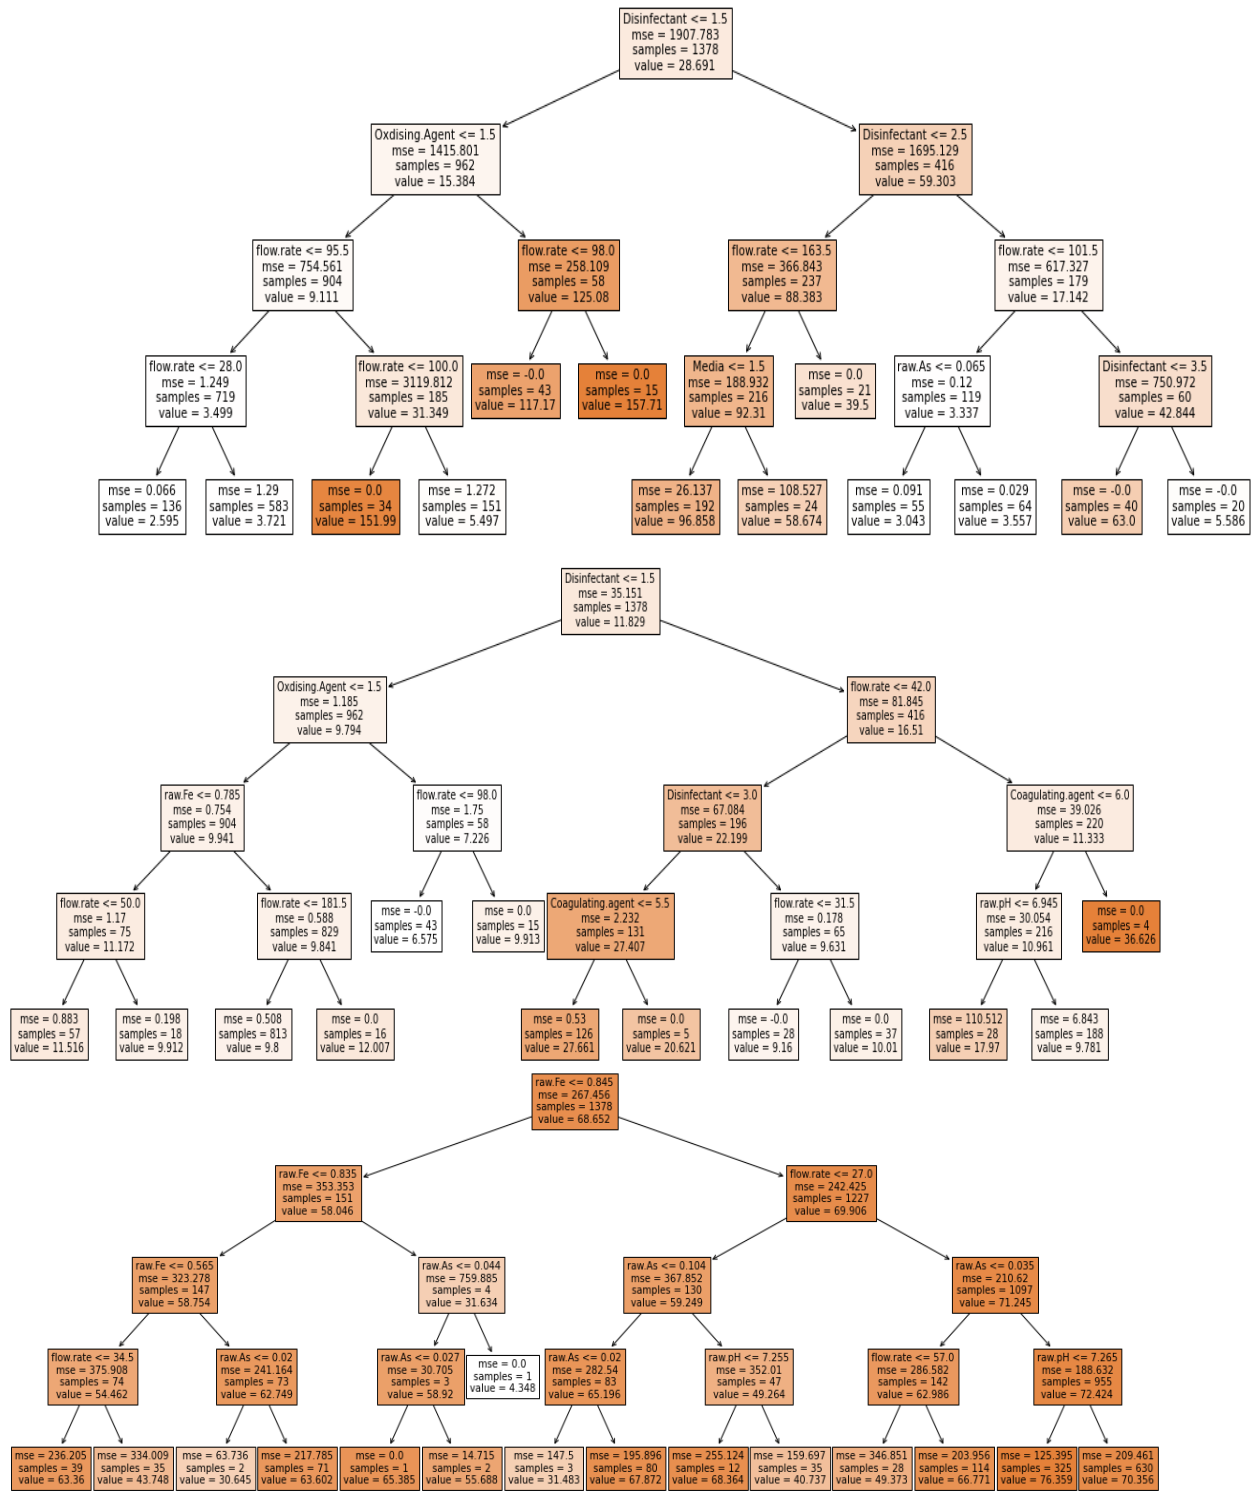

**Figure S5:** Random forest model trees for (a) capital cost, (b) operation and maintenance cost, (c) removal efficiency

## Reference

- Ayoob, S., Gupta, A.K., 2008. Insights into isotherm making in the sorptive removal of fluoride from drinking water. *J. Hazard. Mater.* 152, 976–985. <https://doi.org/10.1016/j.jhazmat.2007.07.072>
- Kundu, S., Gupta, A.K., 2006. Arsenic adsorption onto iron oxide-coated cement (IOCC): Regression analysis of equilibrium data with several isotherm models and their optimization. *Chem. Eng. J.* 122, 93–106. <https://doi.org/10.1016/j.cej.2006.06.002>
- Tang, M., Pérez-Fernández, R., De Baets, B., 2021. A comparative study of machine learning methods for ordinal classification with absolute and relative information. *Knowledge-Based Syst.* 230, 107358. <https://doi.org/10.1016/J.KNOSYS.2021.107358>
